# Supplementary material for: Green Assessment of Phenolic Acid Composition and Antioxidant Capacity of Advanced Potato Mutant Lines through UPLC-qTOF-MS/MS Quantification
Source: MDPI journal article supplement (doi:10.3390/foods12132616), 2023-07-06
Supplement: s1 [file s1]

Supplementary

## Green Assessment of Phenolic Acid Composition and Antioxidant Capacity of Advanced Potato Mutant Lines through UPLC-qTOF-MS/MS Quantification

Sub-Title: Evaluation of potato mutant (M<sub>1</sub>V<sub>8</sub>) lines compared to the corresponding parents by quantification of identified phenolics and antioxidant capacity in tubers

Clara Gomez-Urios <sup>1</sup>, Hristo Kalaydzhiev <sup>2</sup>, Jesus Blesa <sup>1</sup>, Maria Jose Esteve <sup>1</sup>, Emiliya Nacheva <sup>3</sup>, Dida Iserliyska <sup>4</sup> and Nasya Tomlekova <sup>3,\*</sup>

<sup>1</sup> Nutrition and Food Science, Faculty of Pharmacy, University of Valencia, Avenida Vicent Andrés Estellés, s/n, 46100 Burjassot, Spain; clara.urios@uv.es (C.G.-U.); jesus.blesa@uv.es (J.B.); maria.jose.esteve@uv.es (M.J.E.)

<sup>2</sup> Department of Analytical Chemistry and Physical Chemistry, University of Food Technologies—Plovdiv, 26 Maritsa Blvd., 4002 Plovdiv, Bulgaria; hristo.kalaydzhiev@yahoo.com

<sup>3</sup> Maritsa Vegetable Crops Research Institute, Agricultural Academy—Sofia, 32 Brezovsko shosse St, 4003 Plovdiv, Bulgaria; emnach@abv.bg

<sup>4</sup> Institute of Food Preservation and Quality—Plovdiv, Agricultural Academy—Sofia, 154 Vasil Aprilov Blvd, 4003 Plovdiv, Bulgaria; dida\_isser@yahoo.com

\* Correspondence: nasia.tomlekova@gmail.com; Tel.: +359-(0)32-951227

**Table S1:** Quantity of phenolic compounds in tubers of parents, controls and advanced potato mutant lines (M<sub>1</sub>V<sub>8</sub>) – summarized view.

|                                                            |               | Phenolic acid, (μg/mL) |                 |                 |                 |                 |                 |                  |                 |                 |                 |                 |                 |                 |
|------------------------------------------------------------|---------------|------------------------|-----------------|-----------------|-----------------|-----------------|-----------------|------------------|-----------------|-----------------|-----------------|-----------------|-----------------|-----------------|
|                                                            |               | FA                     | RT              | NIN             | API             | HET             | CGA             | QUE              | NR              | HSP             | CA              | NAR             | KMP             |                 |
| Quantity of particular phenolic compound in samples, μg/mL | Parent plants | PC 428                 | 0.1145 ± 0.0004 | N/D             | N/D             | 0.0430 ± 0.0004 | N/D             | 12.5750 ± 0.0028 | N/D             | N/D             | 0.0275 ± 0.0004 | 5.1700 ± 0.0020 | 0.0075 ± 0.0003 | 0.0015 ± 0.0001 |
|                                                            |               | PC 490                 | 0.0205 ± 0.0003 | N/D             | N/D             | 0.0445 ± 0.0009 | N/D             | 3.7970 ± 0.0009  | N/D             | N/D             | 0.0710 ± 0.0010 | N/D             | 0.0070 ± 0.0002 | 0.0015 ± 0.0001 |
|                                                            |               | PC 538                 | N/D             | N/D             | N/D             | 0.0410 ± 0.0007 | N/D             | 2.4010 ± 0.0011  | N/D             | N/D             | N/D             | N/D             | 0.0070 ± 0.0004 | 0.0015 ± 0.0002 |
|                                                            |               | PC 707                 | 0.0230 ± 0.0004 | 0.0110 ± 0.0001 | N/D             | 0.0440 ± 0.0002 | N/D             | 3.3095 ± 0.0012  | N/D             | N/D             | 0.0120 ± 0.0003 | 0.5425 ± 0.0009 | 0.0035 ± 0.0001 | 0.0015 ± 0.0001 |
|                                                            |               | PC 757                 | 0.0480 ± 0.0006 | N/D             | N/D             | 0.0440 ± 0.0004 | N/D             | 1.8965 ± 0.0005  | N/D             | N/D             | 0.0635 ± 0.0010 | N/D             | 0.0065 ± 0.0003 | 0.0010 ± 0.0001 |
|                                                            | Controls      | K-III-2                | 0.0565 ± 0.0004 | 0.2020 ± 0.0008 | 0.0040 ± 0.0003 | 0.0465 ± 0.0007 | 0.0260 ± 0.0004 | 6.8700 ± 0.0007  | N/D             | N/D             | 0.1025 ± 0.0010 | N/D             | 0.0035 ± 0.0002 | 0.0130 ± 0.0006 |
|                                                            |               | K-IV-3                 | 0.0290 ± 0.0007 | N/D             | N/D             | 0.0595 ± 0.0004 | N/D             | 2.1180 ± 0.0008  | 0.0470 ± 0.0008 | N/D             | 0.0025 ± 0.0003 | N/D             | 0.0065 ± 0.0003 | 0.0010 ± 0.0001 |
|                                                            |               | K-VII-4                | 0.0310 ± 0.0002 | 0.0060 ± 0.0002 | N/D             | 0.0405 ± 0.0003 | N/D             | 2.7125 ± 0.0012  | N/D             | N/D             | 0.0045 ± 0.0001 | N/D             | N/D             | 0.0030 ± 0.0001 |
|                                                            | Mutants       | M-I-8                  | 0.0210 ± 0.0002 | 0.0075 ± 0.0005 | N/D             | 0.0985 ± 0.0005 | N/D             | 2.2790 ± 0.0010  | 0.1015 ± 0.0005 | 0.0080 ± 0.0004 | 0.0325 ± 0.0003 | N/D             | 0.0080 ± 0.0002 | 0.0025 ± 0.0002 |
|                                                            |               | M-I-17                 | N/D             | 0.0240 ± 0.0004 | N/D             | 0.0430 ± 0.0003 | 0.0180 ± 0.0005 | 1.7350 ± 0.0006  | N/D             | 0.0085 ± 0.0003 | 0.0590 ± 0.0006 | N/D             | 0.0080 ± 0.0002 | 0.0010 ± 0.0002 |
|                                                            |               | M-III-8                | 0.0220 ± 0.0005 | 0.0295 ± 0.0001 | N/D             | 0.0400 ± 0.0006 | N/D             | 1.9030 ± 0.0006  | 0.0170 ± 0.0002 | 0.0160 ± 0.0007 | 0.1100 ± 0.0013 | 0.0700 ± 0.0005 | 0.0045 ± 0.0003 | 0.0010 ± 0.0002 |
|                                                            |               | M-III-9                | 0.0655 ± 0.0005 | 0.0025 ± 0.0003 | N/D             | 0.0395 ± 0.0004 | N/D             | 1.6415 ± 0.0014  | N/D             | N/D             | 0.0200 ± 0.0002 | N/D             | 0.0060 ± 0.0003 | 0.0015 ± 0.0002 |
|                                                            |               | M-III-30               | 0.0800 ± 0.0005 | 0.0795 ± 0.0007 | N/D             | 0.3200 ± 0.0013 | N/D             | 2.8435 ± 0.0008  | 0.4165 ± 0.0010 | N/D             | 0.0580 ± 0.0005 | 0.5090 ± 0.0014 | 0.0180 ± 0.0004 | 0.0080 ± 0.0002 |
|                                                            |               | M-III-48               | 0.0895 ± 0.0005 | 0.0110 ± 0.0004 | 0.0015 ± 0.0002 | 0.0455 ± 0.0004 | 0.0155 ± 0.0007 | 7.5400 ± 0.0021  | 0.0170 ± 0.0004 | 0.0405 ± 0.0004 | 0.1025 ± 0.0007 | N/D             | 0.0210 ± 0.0002 | 0.0010 ± 0.0003 |
|                                                            |               | M-III-50               | 0.0560 ± 0.0005 | 0.0150 ± 0.0005 | N/D             | 0.0430 ± 0.0004 | N/D             | 9.2200 ± 0.0021  | 0.0185 ± 0.0003 | N/D             | 0.0350 ± 0.0002 | 1.4905 ± 0.0007 | 0.0040 ± 0.0001 | 0.0015 ± 0.0002 |
|                                                            |               | M-IV-14                | 0.0095 ± 0.0004 | 0.0010 ± 0.0003 | N/D             | 0.0455 ± 0.0007 | N/D             | 0.7860 ± 0.0008  | 0.0305 ± 0.0004 | N/D             | N/D             | 0.1185 ± 0.0006 | 0.0030 ± 0.0002 | 0.0025 ± 0.0002 |
|                                                            |               | M-IV-17                | 0.0220 ± 0.0003 | 0.0040 ± 0.0005 | N/D             | 0.0410 ± 0.0004 | N/D             | 2.0435 ± 0.0006  | 0.0200 ± 0.0002 | N/D             | N/D             | N/D             | 0.0050 ± 0.0003 | 0.0015 ± 0.0002 |
|                                                            |               | M-VII-7                | 0.0585 ± 0.0001 | 0.0035 ± 0.0003 | N/D             | 0.0385 ± 0.0005 | N/D             | 1.9860 ± 0.0009  | N/D             | N/D             | 0.0175 ± 0.0003 | 0.0140 ± 0.0004 | 0.0035 ± 0.0002 | 0.0015 ± 0.0001 |

Abbreviations: FA – ferulic acid, RT – rutin, NIN – naringin, API – apigenin, HET – hesperetin, CGA – chlorogenic acid, QUE – quercetin, NR – narirutin, HSP – hesperidin, CA – trans-cinnamic acid, NAR – naringenin, and KMP – kaempferol. N/D – Not detected.

**Table S2.** Data for antioxidant activity received by homogeneous subsets from One-way ANOVA with Tukey's test for all samples studied.

| Method/Test            | Sample   | N | Subset for alpha = 0.05 |           |           |           |           |           |           |
|------------------------|----------|---|-------------------------|-----------|-----------|-----------|-----------|-----------|-----------|
|                        |          |   | 1                       | 2         | 3         | 4         | 5         | 6         | 7         |
| Tukey HSD <sup>a</sup> | PC 428   | 3 | 1.4497192               |           |           |           |           |           |           |
|                        | M-III-30 | 3 | 1.5466196               | 1.5466196 |           |           |           |           |           |
|                        | PC 707   | 3 | 1.8361749               | 1.8361749 | 1.8361749 |           |           |           |           |
|                        | PC 538   | 3 | 1.9649305               | 1.9649305 | 1.9649305 | 1.9649305 |           |           |           |
|                        | M-IV-14  | 3 | 2.0221159               | 2.0221159 | 2.0221159 | 2.0221159 |           |           |           |
|                        | K-III-2  | 3 | 2.0705589               | 2.0705589 | 2.0705589 | 2.0705589 |           |           |           |
|                        | PC 490   | 3 | 2.0870526               | 2.0870526 | 2.0870526 | 2.0870526 |           |           |           |
|                        | K-IV-3   | 3 | 2.1649354               | 2.1649354 | 2.1649354 | 2.1649354 | 2.1649354 |           |           |
|                        | PC 757   | 3 | 2.4160750               | 2.4160750 | 2.4160750 | 2.4160750 | 2.4160750 | 2.4160750 |           |
|                        | M-I-17   | 3 | 2.6110475               | 2.6110475 | 2.6110475 | 2.6110475 | 2.6110475 | 2.6110475 |           |
|                        | M-III-8  | 3 |                         | 2.7323233 | 2.7323233 | 2.7323233 | 2.7323233 | 2.7323233 | 2.7323233 |
|                        | K-VII-4  | 3 |                         |           | 2.7920872 | 2.7920872 | 2.7920872 | 2.7920872 | 2.7920872 |
|                        | M-IV-17  | 3 |                         |           |           | 3.0324648 | 3.0324648 | 3.0324648 | 3.0324648 |
|                        | M-VII-7  | 3 |                         |           |           | 3.0791689 | 3.0791689 | 3.0791689 | 3.0791689 |
|                        | M-I-8    | 3 |                         |           |           |           | 3.3184088 | 3.3184088 | 3.3184088 |
|                        | M-III-50 | 3 |                         |           |           |           |           | 3.4108807 | 3.4108807 |
|                        | M-III-9  | 3 |                         |           |           |           |           |           | 3.8091633 |
|                        | M-III-48 | 3 |                         |           |           |           |           |           | 3.8425851 |
|                        | Sig.     |   | .061                    | .050      | .243      | .086      | .064      | .192      | .088      |

**Table S3.** Validation parameters of UPLC-qTOF-MS/MS method.

| Nº | Analytes                    | Molecular formula                               | <i>m/z</i> | [ <i>m</i> -H] | Error<br>(ppm) | R <sup>2</sup> |
|----|-----------------------------|-------------------------------------------------|------------|----------------|----------------|----------------|
| 1  | Quercetin                   | C <sub>15</sub> H <sub>10</sub> O <sub>7</sub>  | 302,04265  | 301,03538      | 0,4            | 0.9997         |
| 2  | Chlorogenic acid            | C <sub>16</sub> H <sub>18</sub> O <sub>9</sub>  | 354,09508  | 353,08781      | -0,7           | 0.9942         |
| 3  | Rutin                       | C <sub>27</sub> H <sub>30</sub> O <sub>16</sub> | 610,15339  | 609,14611      | -0,9           | 0.9999         |
| 4  | Ferulic acid                | C <sub>10</sub> H <sub>10</sub> O <sub>4</sub>  | 194,05791  | 193,05063      | -0,2           | 0.9992         |
| 5  | Narirutin                   | C <sub>27</sub> H <sub>32</sub> O <sub>14</sub> | 580,17921  | 579,17193      | -1,2           | 0.9986         |
| 6  | Naringin                    | C <sub>27</sub> H <sub>32</sub> O <sub>14</sub> | 580,17921  | 579,17193      | -1,2           | 0.9986         |
| 7  | Hesperidin                  | C <sub>28</sub> H <sub>34</sub> O <sub>15</sub> | 610,18977  | 609,18249      | -0,9           | 0.9999         |
| 8  | <i>trans</i> -cinnamic acid | C <sub>9</sub> H <sub>8</sub> O <sub>2</sub>    | 148,05243  | 147,04515      | 0,6            | 0.9991         |
| 9  | Naringenin                  | C <sub>15</sub> H <sub>12</sub> O <sub>5</sub>  | 272,06847  | 271,0612       | 0,7            | 0.9998         |
| 10 | Apigenin                    | C <sub>15</sub> H <sub>10</sub> O <sub>5</sub>  | 270,05282  | 269,04555      | 1,1            | 0.9986         |
| 11 | Hesperetin                  | C <sub>16</sub> H <sub>14</sub> O <sub>6</sub>  | 302,07904  | 301,07176      | -0,9           | 0.9996         |
| 12 | Kaempferol                  | C <sub>15</sub> H <sub>10</sub> O <sub>6</sub>  | 286,04774  | 285,04046      | 1,4            | 0.997          |
